# Supplementary material
Source: PubMed Central journal article supplement (PMC5318399)

# Supplemental Figure 1.

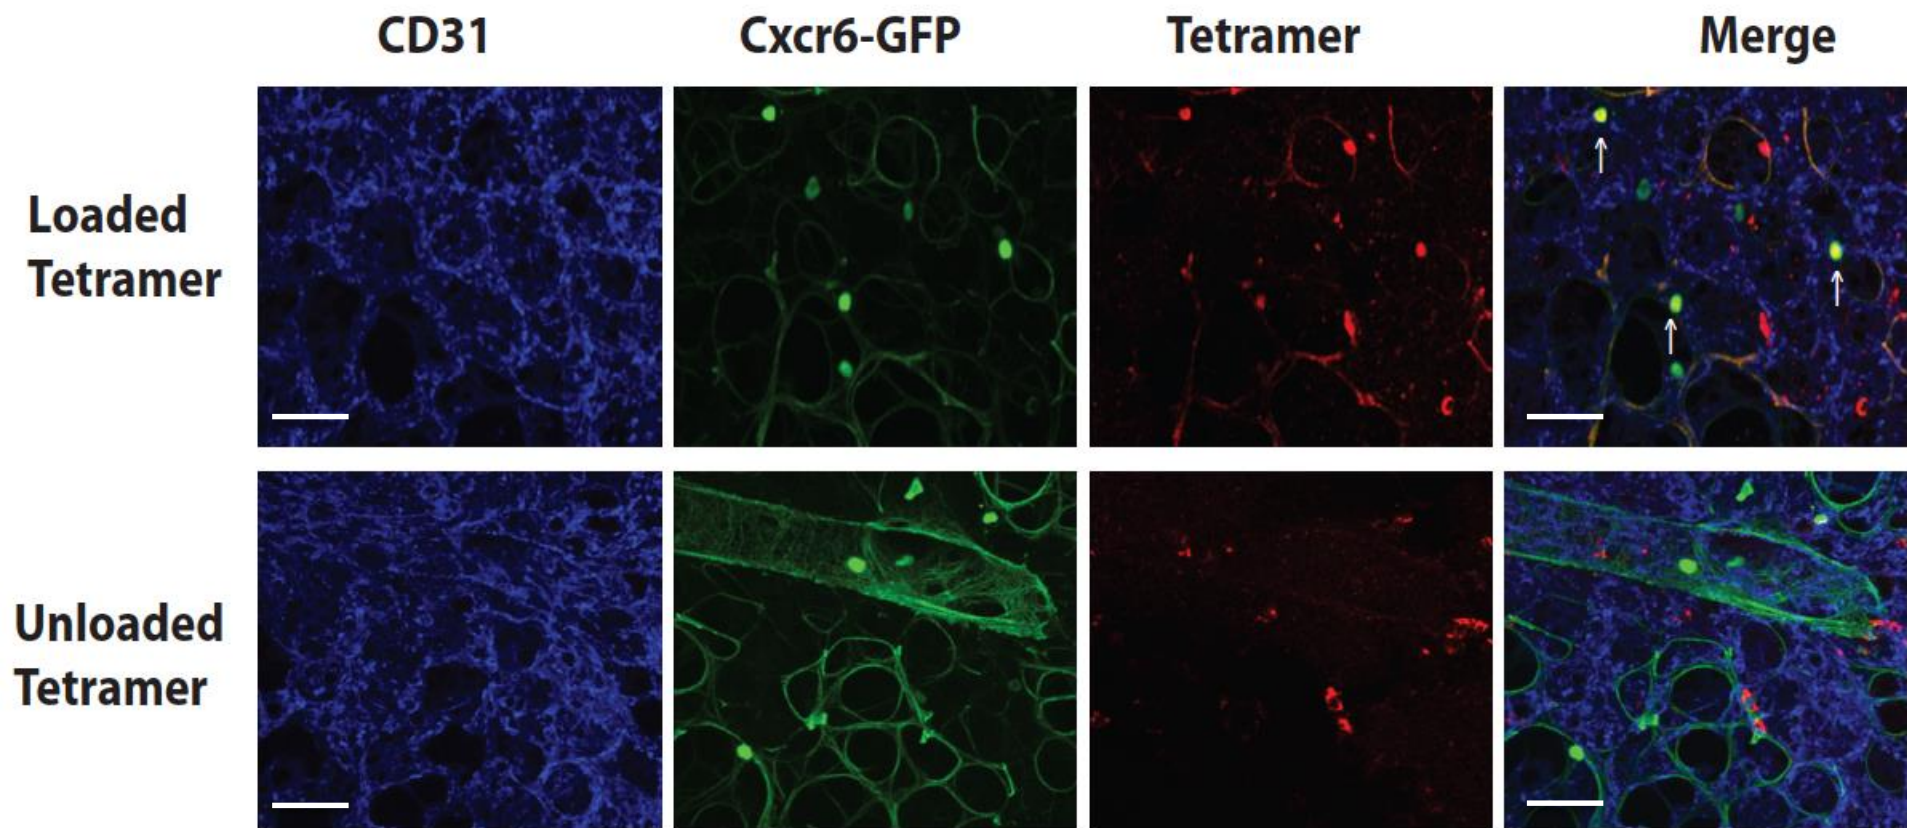

Supplemental Figure 2.

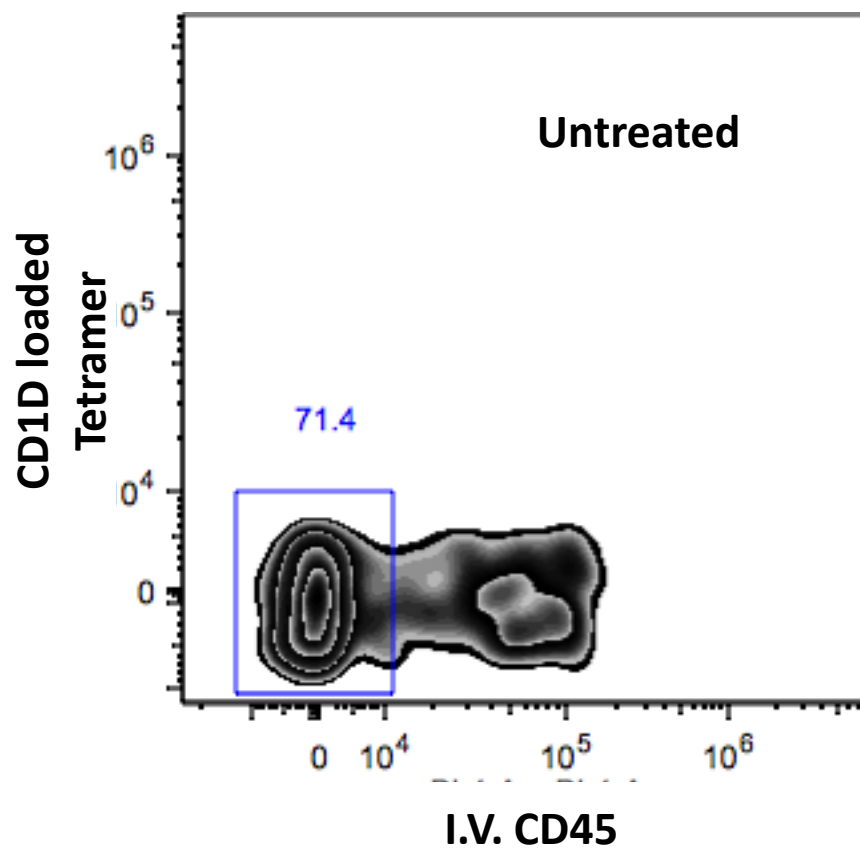

Supplemental Fig. 3

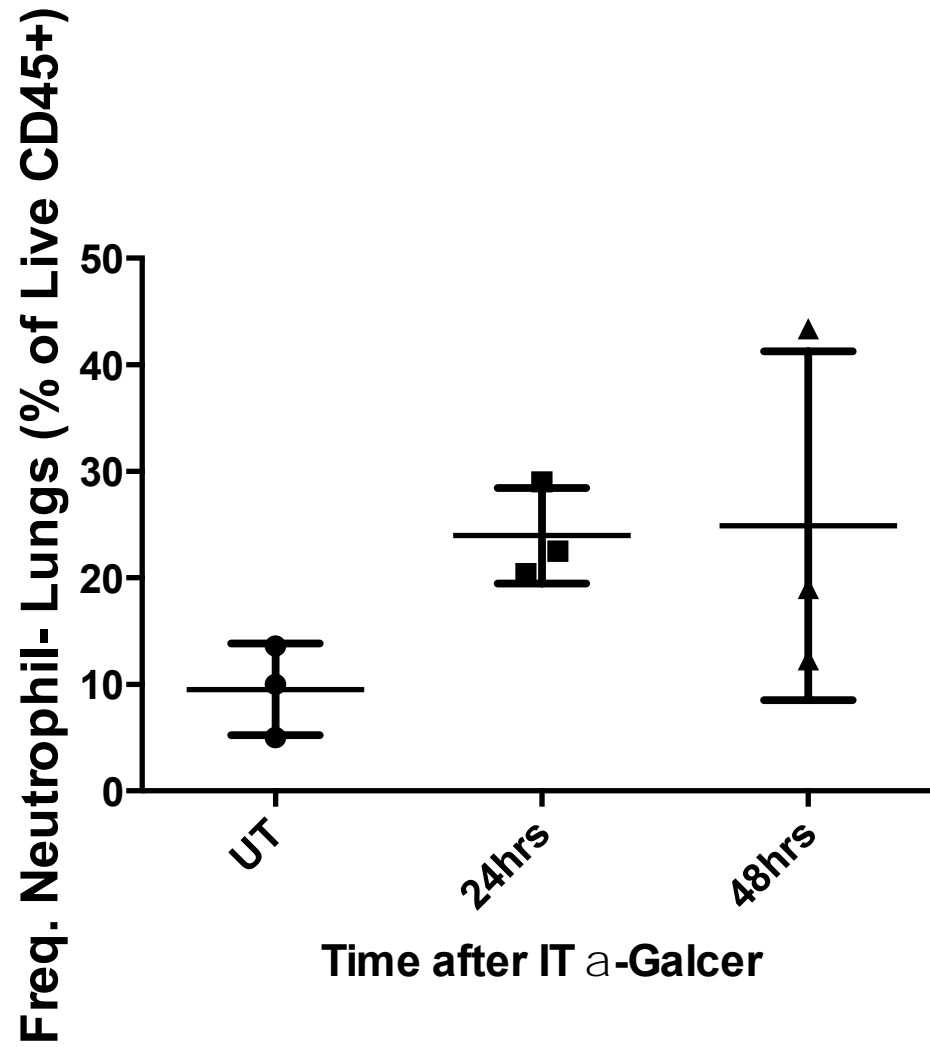

Supplemental Figure 4.

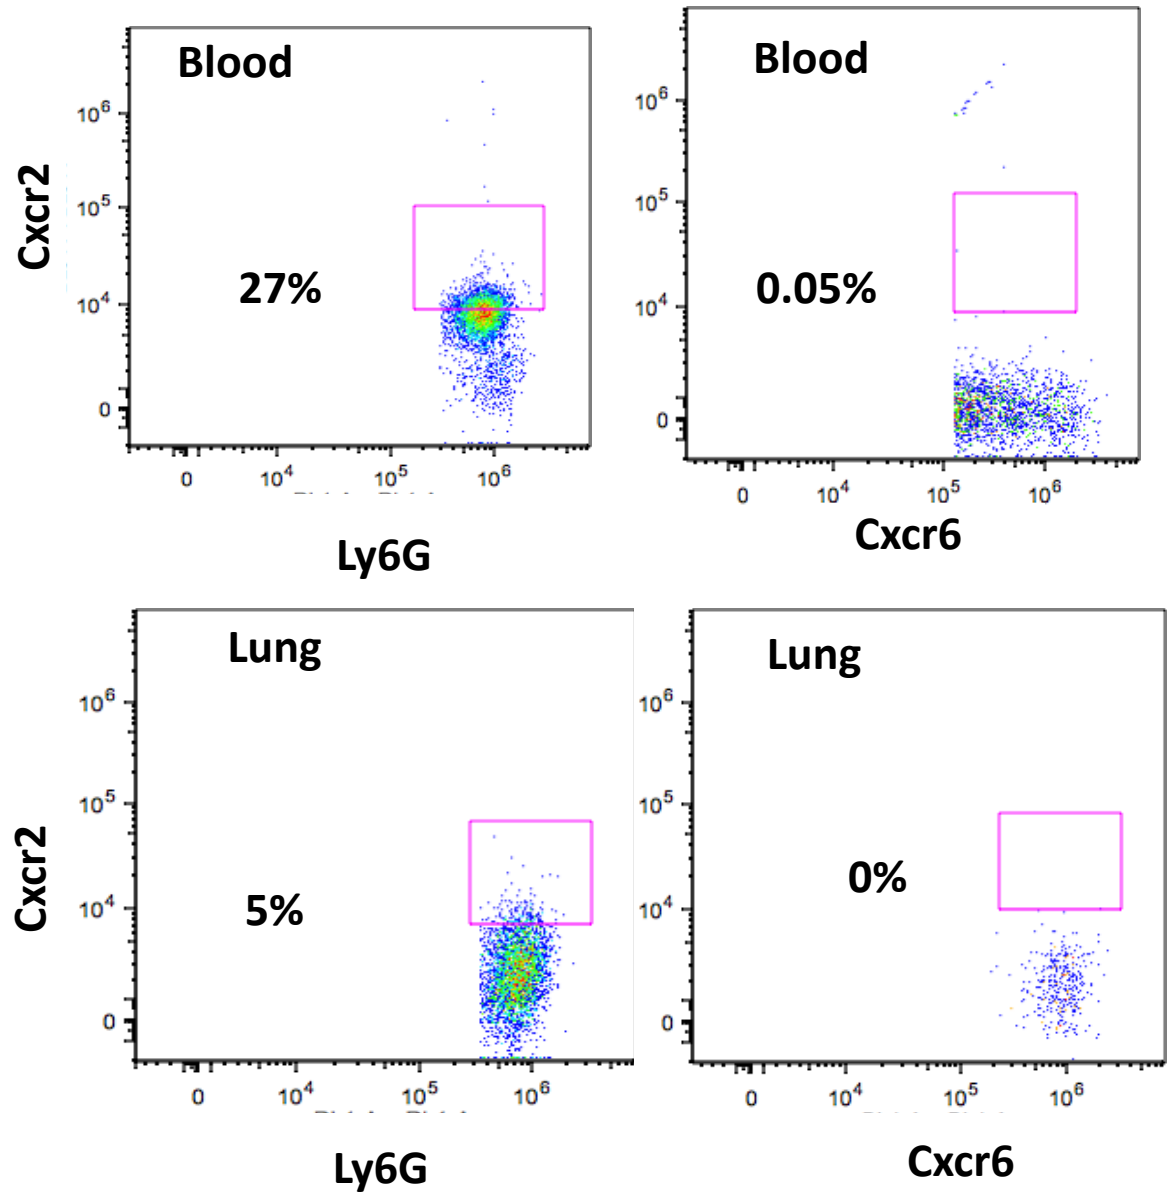

# Supplemental Figure 5.

A.

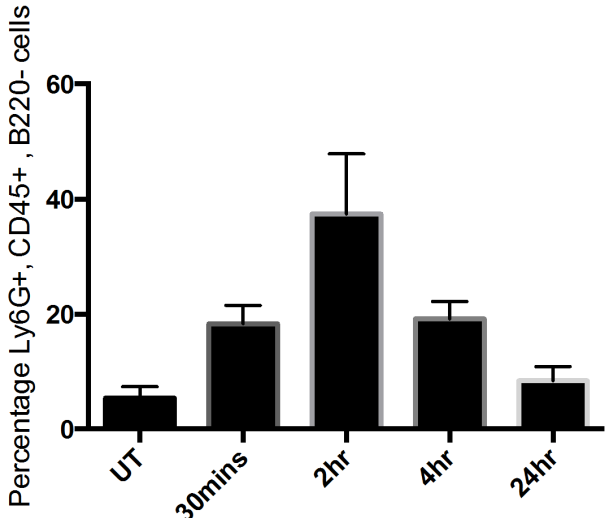

B.

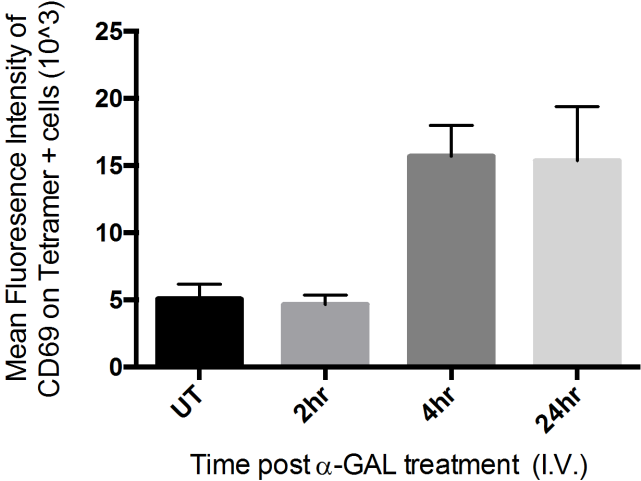

C.

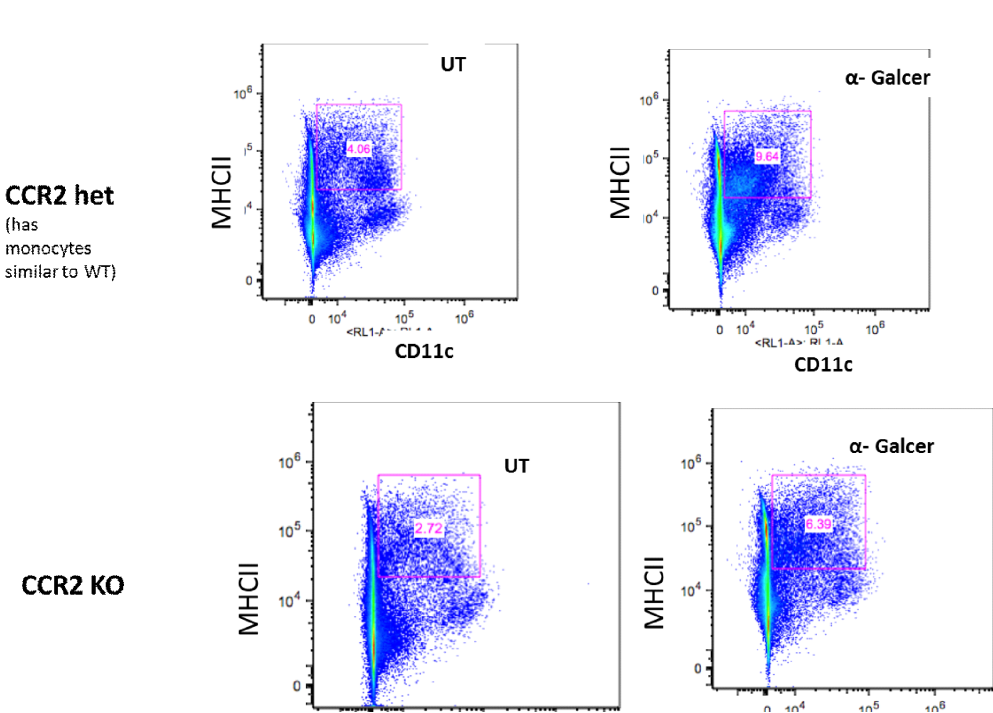

# Supplemental Figure 6: DC depletion

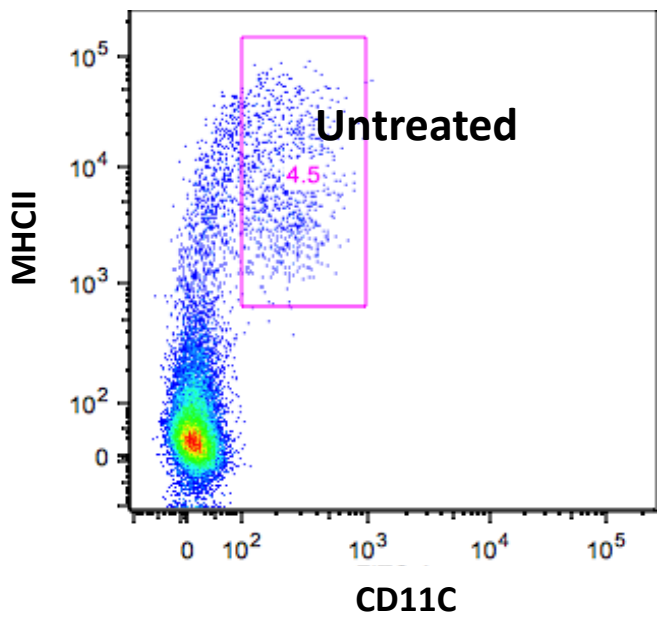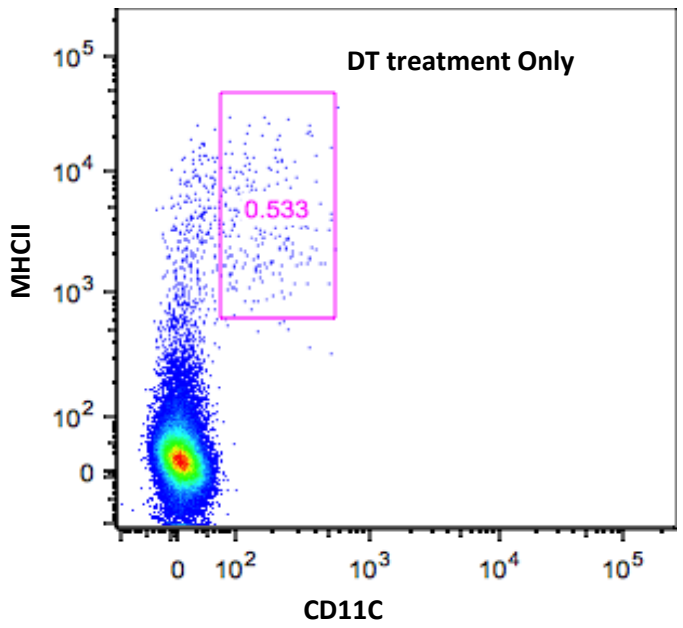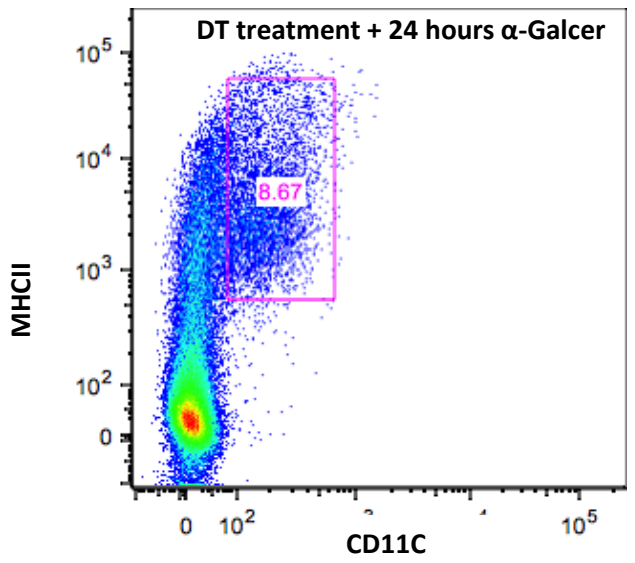

# Supplemental Figure 7a.

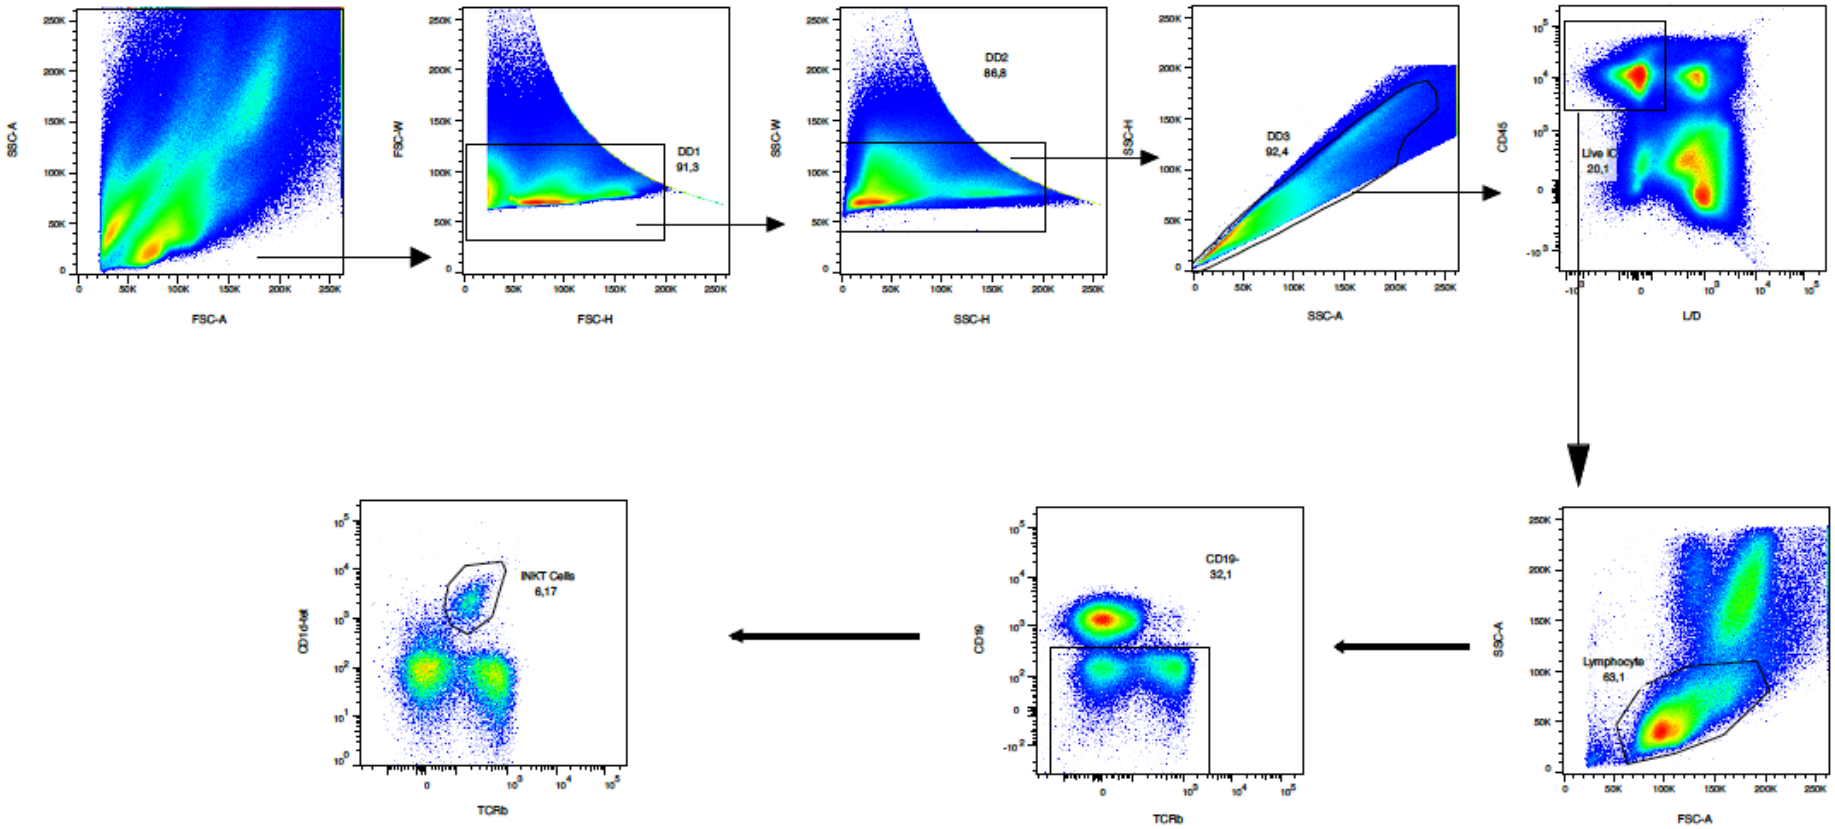

# Supplemental Fig. 7b

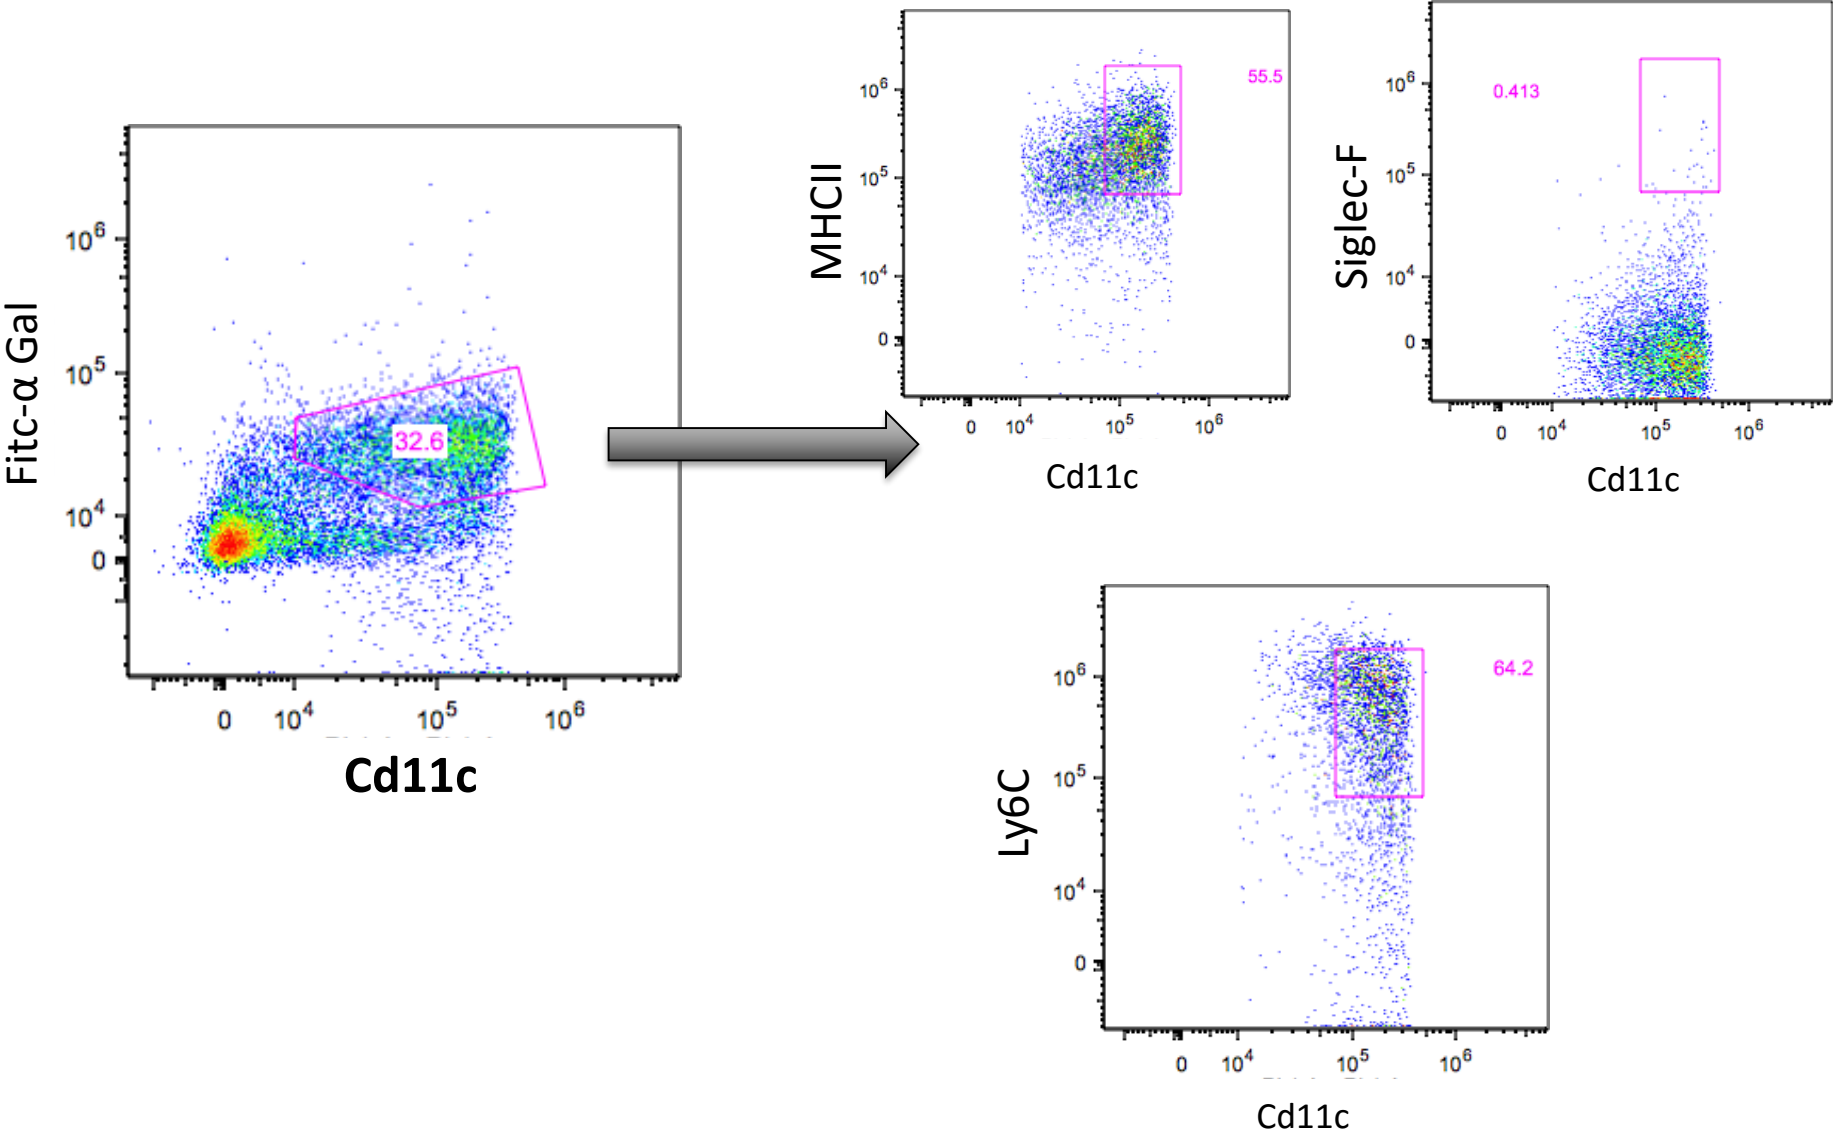

Supplement: NIHMS848862-supplement-1-7.pdf [file NIHMS848862-supplement-1-7.pdf]
